# Supplementary material for: Assessment of Intestinal Permeability and Inflammation Bio-Markers in Patients with Rheumatoid Arthritis
Source: MDPI journal article supplement (doi:10.3390/nu15102386), 2023-05-19
Supplement: s1 [file s1]

| Pat-ID |        |     | Smoking status |        |       | Comorbidity |
|--------|--------|-----|----------------|--------|-------|-------------|
|        | Gender | Age | Current        | Former | Never | Obesity     |
|        |        |     |                |        |       |             |
| 1      | f      | 54  | 0              | 0      | 1     | 0           |
| 2      | f      | 67  | 0              | 1      | 0     | 0           |
| 3      | f      | 69  | 0              | 0      | 1     | 0           |
| 4      | f      | 71  | 0              | 1      | 0     | 0           |
| 5      | f      | 61  | 0              | 0      | 1     | 1           |
| 6      | f      | 65  | 0              | 1      | 0     | 0           |
| 7      | m      | 59  | 0              | 0      | 1     | 0           |
| 8      | m      | 56  | 0              | 1      | 0     | 0           |
| 9      | f      | 71  | 0              | 0      | 1     | 0           |
| 10     | f      | 57  | 0              | 0      | 1     | 0           |
| 11     | f      | 79  | 0              | 0      | 1     | 1           |
| 12     | f      | 66  | 1              | 0      | 0     | 0           |
| 13     | m      | 48  | 0              | 0      | 1     | 0           |
| 14     | m      | 57  | 0              | 1      | 0     | 0           |
| 15     | f      | 74  | 0              | 0      | 1     | 1           |
| 16     | f      | 73  | 0              | 0      | 1     | 0           |
| 17     | m      | 51  | 0              | 1      | 0     | 0           |
| 18     | m      | 70  | 1              | 0      | 0     | 0           |
| 19     | f      | 73  | 0              | 1      | 0     | 0           |
| 20     | f      | 56  | 0              | 1      | 0     | 1           |
| 21     | f      | 64  | 0              | 1      | 0     | 0           |
| 22     | f      | 74  | 0              | 1      | 0     | 1           |
| 23     | f      | 69  | 0              | 1      | 0     | 0           |
| 24     | m      | 55  | 0              | 1      | 0     | 1           |
| 25     | m      | 70  | 0              | 1      | 0     | 0           |
| 26     | m      | 45  | 1              | 0      | 0     | 1           |
| 27     | m      | 43  | 0              | 0      | 1     | 0           |
| 28     | f      | 56  | 0              | 1      | 0     | 1           |
| 29     | f      | 62  | 0              | 0      | 1     | 1           |
| 30     | f      | 31  | 0              | 0      | 1     | 0           |
| 31     | f      | 66  | 0              | 1      | 0     | 0           |
| 32     | m      | 78  | 0              | 0      | 1     | 0           |
| 33     | f      | 63  | 0              | 0      | 1     | 1           |
| 34     | m      | 45  | 0              | 0      | 1     | 1           |
| 35     | m      | 58  | 0              | 1      | 0     | 1           |
| 36     | f      | 62  | 0              | 0      | 1     | 0           |
| 37     | m      | 57  | 1              | 0      | 0     | 0           |
| 38     | m      | 57  | 0              | 0      | 1     | 0           |
| 39     | f      | 60  | 1              | 0      | 0     | 0           |
| 40     | f      | 65  | 0              | 0      | 1     | 0           |
| 41     | f      | 31  | 0              | 0      | 1     | 0           |
| 42     | m      | 54  | 0              | 1      | 0     | 0           |
| 43     | f      | 65  | 0              | 1      | 0     | 0           |
| 44     | f      | 72  | 0              | 0      | 1     | 0           |
| 45     | m      | 66  | 0              | 1      | 0     | 1           |
| 46     | m      | 73  | 0              | 1      | 0     | 0           |
| 47     | f      | 63  | 0              | 1      | 0     | 0           |

|    |   |    |   |   |   |   |
|----|---|----|---|---|---|---|
| 48 | f | 55 | 0 | 1 | 0 | 1 |
| 49 | m | 58 | 0 | 0 | 1 | 0 |
| 50 | f | 73 | 1 | 0 | 0 | 1 |
| 51 | f | 58 | 0 | 1 | 0 | 0 |
| 52 | f | 45 | 0 | 1 | 0 | 0 |
| 53 | f | 66 | 0 | 1 | 0 | 0 |
| 54 | f | 70 | 0 | 0 | 1 | 1 |
| 55 | f | 57 | 0 | 0 | 1 | 0 |
| 56 | m | 60 | 0 | 1 | 0 | 1 |
| 57 | f | 78 | 0 | 0 | 1 | 1 |
| 58 | f | 80 | 0 | 0 | 1 | 0 |
| 59 | f | 53 | 0 | 0 | 1 | 0 |
| 60 | f | 71 | 0 | 0 | 1 | 1 |
| 61 | f | 74 | 0 | 0 | 1 | 0 |
