# Supplementary material for: Assessment of Intestinal Permeability and Inflammation Bio-Markers in Patients with Rheumatoid Arthritis
Source: MDPI journal article supplement (doi:10.3390/nu15102386), 2023-05-19
Supplement: s1 [file s1]

**Table S2: Frequencies of abnormal values of fecal and blood biomarkers (non-significant results)**

A: related to SDAI

B: related to disease duration

C: Smoking status

D: BMI, ACPA, drug treatment

**Table S2 A:** Frequency of abnormal values of fecal and blood biomarkers related to SDAI.

| SDAI, units               | N  | 0.0 - 3.3  | 3.4 - 11.0    | 11.1 - 26.0       | 26.1 - 86.0   | p-value |
|---------------------------|----|------------|---------------|-------------------|---------------|---------|
|                           |    | remission  | low activity  | moderate activity | high activity |         |
| Serum Zonulin, ng/ml      | 61 | 43% (3/7)  | 35% (8/23)    | 42% (11/26)       | 20% (1/5)     | 0.88    |
| Serum Calprotectin, µg/ml | 61 | 29% (2/7)  | 22% (5/23)    | 15% (4/26)        | 60% (3/5)     | 0.17    |
| Fecal Zonulin, ng/g       | 61 | 100% (7/7) | 95.7% (22/23) | 100% (26/26)      | 100% (5/5)    | 0.57    |
| Fecal Calprotectin, µg/g  | 61 | 0% (0/7)   | 39% (9/23)    | 46% (12/26)       | 40% (2/5)     | 0.15    |
| Plasma LPS, ng/ml         | 30 | 80% (4/5)  | 77% (10/13)   | 100% (10/10)      | 100% 2/2)     | 0.41    |

**Table S2 B:** Frequency of abnormal values of fecal and blood biomarkers related to disease duration.

| Disease duration, years   | N  | 0-2          | 3-10          | > 10         | p-value |
|---------------------------|----|--------------|---------------|--------------|---------|
| Serum Zonulin, ng/ml      | 61 | 29% (8/28)   | 40% (8/20)    | 54% (7/13)   | 0.25    |
| Serum Calprotectin, µg/ml | 61 | 29% (8/28)   | 20% (4/20)    | 15% (2/13)   | 0.73    |
| Fecal Zonulin, ng/g       | 61 | 100% (28/28) | 95% (19/20)   | 100% (13/13) | 0.54    |
| Fecal Calprotectin, µg/g  | 61 | 36% 10/28)   | 45% (9/20)    | 31% (4/13)   | 0.75    |
| Plasma LPS, ng/ml         | 30 | 80% (8/10)   | 90.9% (10/11) | 88.9% (8/9)  | 0.83    |

**Table S2 C:** Frequency of abnormal values of fecal and blood biomarkers related to smoking status.

| Smoking Status            | N  | Current     | Former        | Never         | p-value |
|---------------------------|----|-------------|---------------|---------------|---------|
| Serum Zonulin, ng/ml      | 61 | 33% (2/6)   | 38% (10/26)   | 38% (11/29)   | 1       |
| Serum Calprotectin, µg/ml | 61 | 17% (1/6)   | 19% (5/26)    | 28% (8/29)    | 0.82    |
| Fecal Zonulin, ng/g       | 61 | 100% (6/6)  | 96.2% (25/26) | 100% (29/29)  | 0.52    |
| Fecal Calprotectin, µg/g  | 61 | 50% (3/6)   | 31% (8/26)    | 41% (12/29)   | 0.64    |
| Plasma LPS, ng/ml         | 30 | 66.7% (2/3) | 91.7% (11/12) | 86.7% (13/15) | 0.55    |

**Table S2 D:** Frequency of abnormal values of fecal and blood biomarkers related to smoking BMI, ACPA, and drug treatment.

| Biomarker |                           | N  |               |               | p-value |
|-----------|---------------------------|----|---------------|---------------|---------|
| BMI       |                           |    | ≥ 25          | < 25          |         |
|           | Serum Zonulin, ng/ml      | 61 | 32% (12/37)   | 46% (11/24)   | 0.42    |
|           | Serum Calprotectin, µg/ml | 61 | 16% (6/37)    | 33% (8/24)    | 0.14    |
|           | Fecal Zonulin, ng/g       | 61 | 97.3% (36/37) | 100% (24/24)  | 1       |
|           | Fecal Calprotectin, µg/g  | 61 | 46% (17/37)   | 25% (6/24)    | 0.15    |
|           | Plasma LPS, ng/ml         | 30 | 82% (18/22)   | 100% (8/8)    | 0.55    |
| ACPA      |                           |    | positive      | negative      |         |
|           | Serum Zonulin, ng/ml      | 61 | 50% (8/16)    | 34% (15/44)   | 0.37    |
|           | Serum Calprotectin, µg/ml | 61 | 31% (5/16)    | 20% (9/44)    | 0.49    |
|           | Fecal Zonulin, ng/g       | 61 | 100% (16/16)  | 97.7% (43/44) | 1       |

|                                                                 |                           |    |              |               |      |
|-----------------------------------------------------------------|---------------------------|----|--------------|---------------|------|
|                                                                 | Fecal Calprotectin, µg/g  | 61 | 31% (5/16)   | 41% (18/44)   | 0.56 |
|                                                                 | Plasma LPS, ng/ml         | 30 | 89% (8/9)    | 86% (18/21)   | 1    |
|                                                                 |                           |    | <b>yes</b>   | <b>no</b>     |      |
| Methotrexate<br>(MTX)                                           | Serum Zonulin, ng/ml      | 61 | 43% (9/21)   | 35% (14/40)   | 0.59 |
|                                                                 | Serum Calprotectin, µg/ml | 61 | 33% (7/21)   | 18% (7/40)    | 0.21 |
|                                                                 | Fecal Zonulin, ng/g       | 61 | 100% (21/21) | 97.5% (39/40) | 1    |
|                                                                 | Fecal Calprotectin, µg/g  | 61 | 38% (8/21)   | 38% (15/40)   | 1    |
|                                                                 | Plasma LPS, ng/ml         | 30 | 90% (9/10)   | 85% (17/20)   | 1    |
|                                                                 |                           |    | <b>yes</b>   | <b>no</b>     |      |
| MTX +<br>Glucocorticoids                                        | Serum Zonulin, ng/ml      | 61 | 60% (3/5)    | 39% (11/28)   | 0.52 |
|                                                                 | Serum Calprotectin, µg/ml | 61 | 60% (3/)     | 14% (4/28)    | 0.1  |
|                                                                 | Fecal Zonulin, ng/g       | 61 | 100% (5/5)   | 96.% (27/28)  | 1    |
|                                                                 | Fecal Calprotectin, µg/g  | 61 | 60% (3/5)    | 29% (8/28)    | 0.31 |
|                                                                 | Plasma LPS, ng/ml         | 30 | 100% (2/2)   | 81.2% (13/16) | 0.56 |
|                                                                 |                           |    | <b>yes</b>   | <b>no</b>     |      |
| Leflunomide/<br>Sulfasalazine<br>Treatment                      | Serum Zonulin, ng/ml      | 61 | 33% (3/9)    | 39% (20/51)   | 1    |
|                                                                 | Serum Calprotectin, µg/ml | 61 | 11% (1/9)    | 26% (13/51)   | 0.67 |
|                                                                 | Fecal Zonulin, ng/g       | 61 | 100% (9/9)   | 98% (50/51)   | 1    |
|                                                                 | Fecal Calprotectin, µg/g  | 61 | 22% (2/9)    | 39% (20/51)   | 0.46 |
|                                                                 | Plasma LPS, ng/ml         | 30 | 100% (5/5)   | 84% (21/25)   | 1    |
|                                                                 |                           |    | <b>yes</b>   | <b>no</b>     |      |
| Leflunomide/Sulfa<br>salazine +<br>Glucocorticoids<br>Treatment | Serum Zonulin, ng/ml      | 61 | 50% (2/4)    | 41% (16/39)   | 0.61 |
|                                                                 | Serum Calprotectin, µg/ml | 61 | 25% (1/4)    | 20% (8/39)    | 0.79 |
|                                                                 | Fecal Zonulin, ng/g       | 61 | 100% (4/4)   | 97.4% (38/39) | 1    |
|                                                                 | Fecal Calprotectin, µg/g  | 61 | 25% (1/4)    | 31% (12/39)   | 0.3  |
|                                                                 | Plasma LPS, ng/ml         | 30 | 100% (2/2)   | 81% (17/21)   | 0.69 |
|                                                                 |                           |    | <b>yes</b>   | <b>no</b>     |      |
| JAK-Inhibitor<br>Treatment                                      | Serum Zonulin, ng/ml      | 61 | 33% (1/3)    | 38% (22/58)   | 1    |
|                                                                 | Serum Calprotectin, µg/ml | 61 | 33% (1/3)    | 22% (13/58)   | 0.55 |
|                                                                 | Fecal Zonulin, ng/g       | 61 | 100% (3/3)   | 98.3% (57/58) | 1    |
|                                                                 | Fecal Calprotectin, µg/g  | 61 | 33% (1/3)    | 38% (22/58)   | 1    |
|                                                                 | Plasma LPS, ng/ml         | 30 | 100% (3/3)   | 85% (23/27)   | 1    |
