# Supplementary material for: Assessment of Intestinal Permeability and Inflammation Bio-Markers in Patients with Rheumatoid Arthritis
Source: MDPI journal article supplement (doi:10.3390/nu15102386), 2023-05-19
Supplement: s1 [file s1]

**Table S3:** Univariate and multivariate linear regression models (non-significant results)

| Dependent Variable         | Independent Variable          | Univariable Coefficient | p-value | Multi-variable Coefficient (R <sup>2</sup> ) | p-value |
|----------------------------|-------------------------------|-------------------------|---------|----------------------------------------------|---------|
| Serum Zonulin (ng/ml)      | CRP, mg/dL                    | 2.62                    | 0.118   |                                              |         |
|                            | Total Cholesterol, mmol/L     | 0.00                    | 0.893   |                                              |         |
|                            | Non-HDL-Cholesterol, mmol/L   | 0.01                    | 0.721   |                                              |         |
|                            | Fasting Triglycerides, mmol/L | 0.03                    | 0.206   |                                              |         |
|                            | Total Fiber Intake, g         | 0.02                    | 0.926   |                                              |         |
|                            | Fecal Total SCFAs, (μmol/g)   | -0.00                   | 0.947   |                                              |         |
|                            | Fecal Butyrate, (μmol/g)      | -0.01                   | 0.863   |                                              |         |
|                            | Plasma LPS, ng/ml             | 6.23                    | 0.384   |                                              |         |
| Serum Calprotectin (μg/ml) | Disease duration, years       | 0.01                    | 0.591   |                                              |         |
|                            | CRP, mg/dL                    | 0.25                    | 0.294   |                                              |         |
|                            | Total Cholesterol, mmol/L     | -0.01                   | 0.192   |                                              |         |
|                            | Non-HDL-Cholesterol, mmol/L   | -0.01                   | 0.253   |                                              |         |
|                            | Fasting Triglycerides, mmol/L | 0.00                    | 0.716   |                                              |         |
|                            | Total Fiber Intake, g         | 0.01                    | 0.639   |                                              |         |
|                            | Fecal Total SCFAs, (μmol/g)   | 0.00                    | 0.944   |                                              |         |
|                            | Fecal Butyrate, (μmol/g)      | 0.00                    | 0.924   |                                              |         |
|                            | Plasma LPS, ng/ml             | -0.23                   | 0.825   |                                              |         |
| Fecal Zonulin (ng/g)       | Disease duration, years       | 0.38                    | 0.853   |                                              |         |
|                            | CRP, mg/dL                    | -10.72                  | 0.701   |                                              |         |
|                            | Total Cholesterol, mmol/L     | 0.30                    | 0.555   |                                              |         |
|                            | Non-HDL-Cholesterol, mmol/L   | 0.31                    | 0.547   |                                              |         |
|                            | Fasting Triglycerides, mmol/L | 0.25                    | 0.451   |                                              |         |
|                            | Total Fiber Intake, g         | -0.50                   | 0.873   |                                              |         |
|                            | Plasma LPS, ng/ml             | -8.66                   | 0.937   |                                              |         |

|                                           |                                          |       |       |  |  |
|-------------------------------------------|------------------------------------------|-------|-------|--|--|
| Fecal Calprotectin<br>( $\mu\text{g/g}$ ) | Disease duration, years                  | -0.97 | 0.508 |  |  |
|                                           | CRP, mg/dL                               | 6.45  | 0.745 |  |  |
|                                           | Total Cholesterol, mmol/L                | -0.14 | 0.707 |  |  |
|                                           | Non-HDL-Cholesterol, mmol/L              | -0.18 | 0.623 |  |  |
|                                           | Fasting Triglycerides, mmol/L            | -0.29 | 0.223 |  |  |
|                                           | Total Fiber Intake, g                    | -0.55 | 0.807 |  |  |
|                                           | Fecal Total SCFAs, ( $\mu\text{mol/g}$ ) | -0.07 | 0.738 |  |  |
|                                           | Fecal Butyrate, ( $\mu\text{mol/g}$ )    | -0.29 | 0.762 |  |  |
