# Supplementary figures and images for: Assessment of Intestinal Permeability and Inflammation Bio-Markers in Patients with Rheumatoid Arthritis
Source: MDPI journal article supplement (doi:10.3390/nu15102386), 2023-05-19

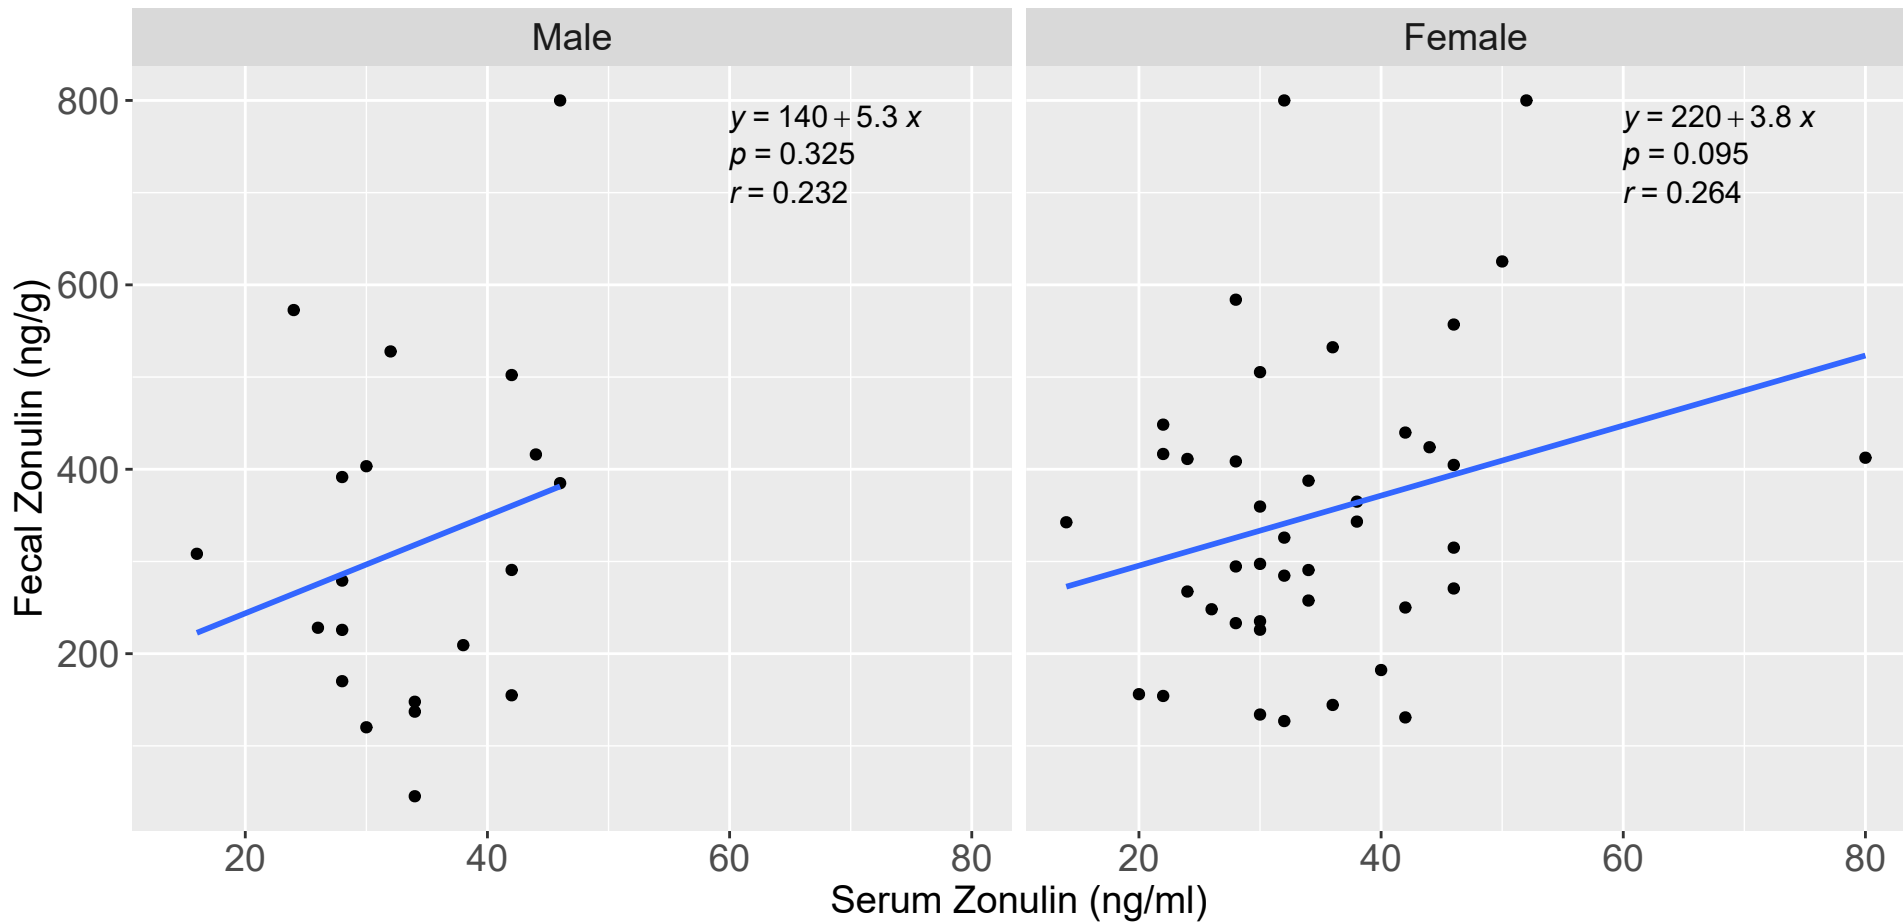

Supplement: s1 [file s1]

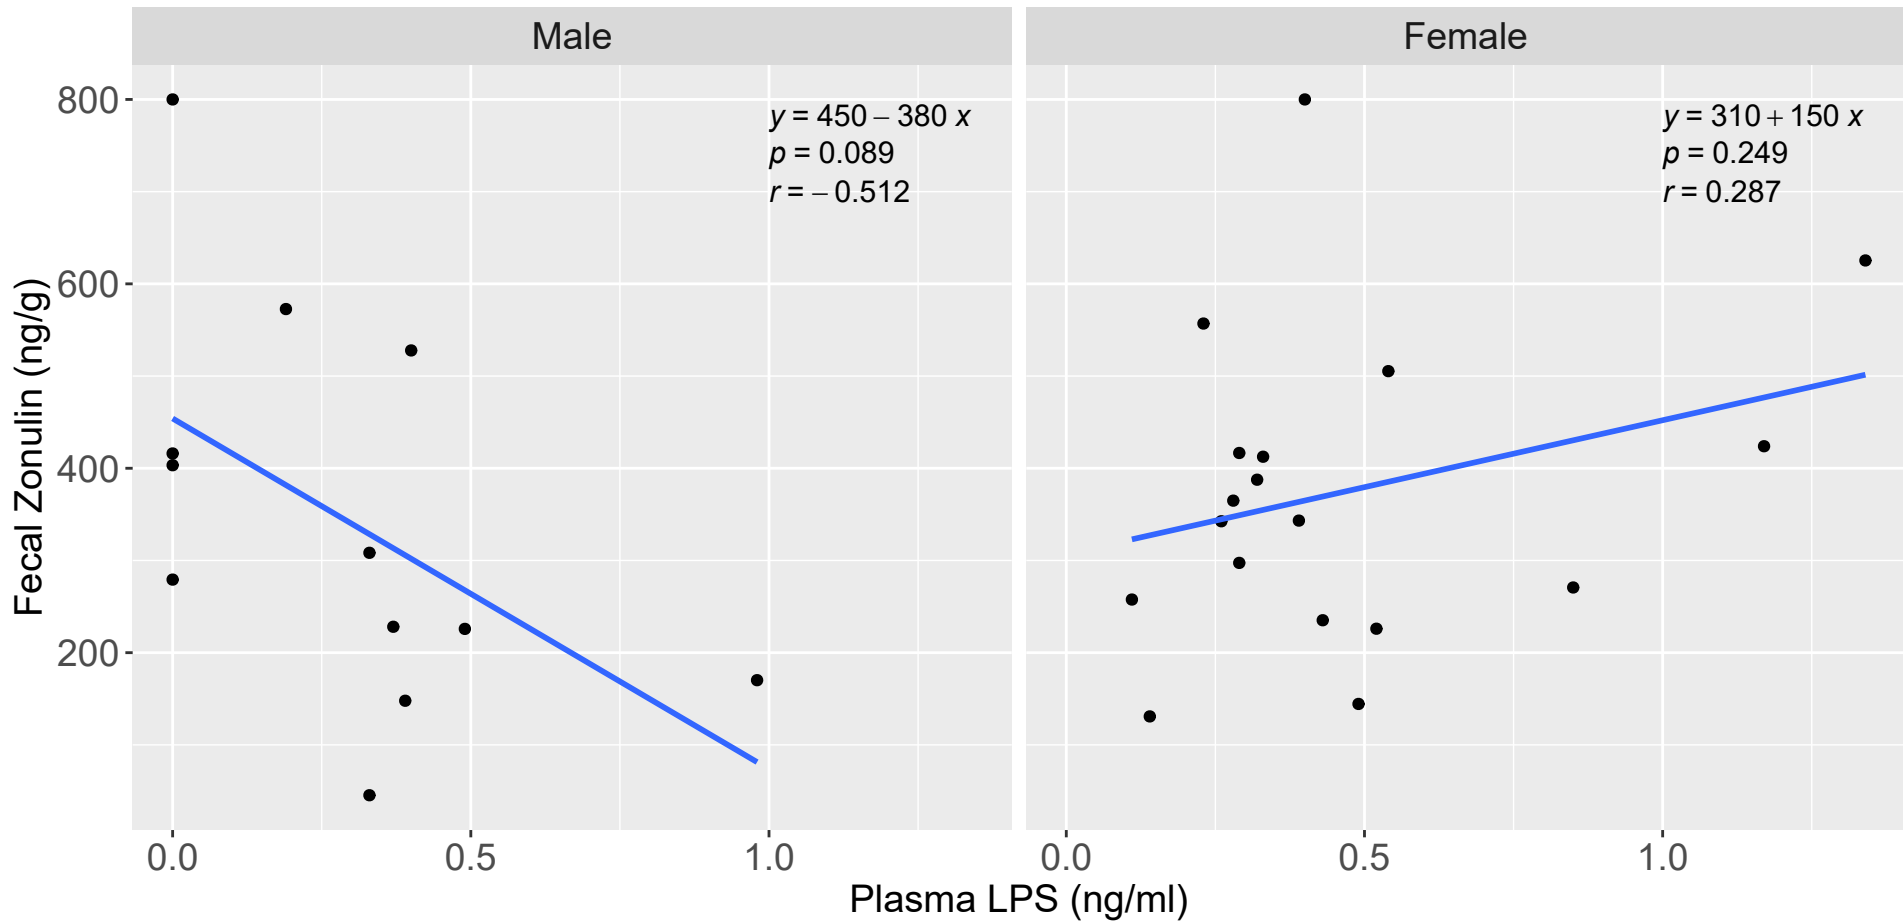

Supplement: s1 [file s1]

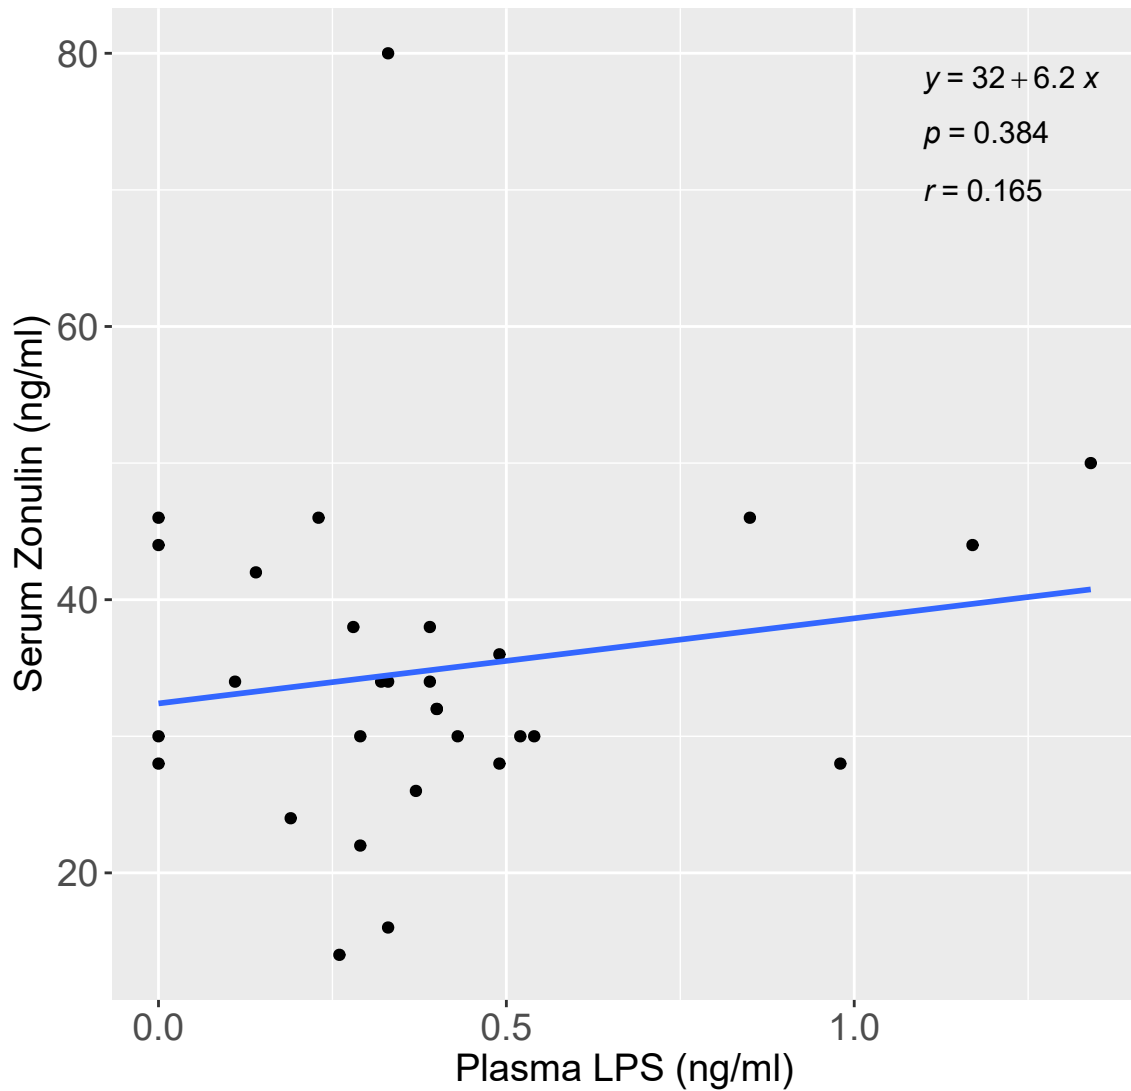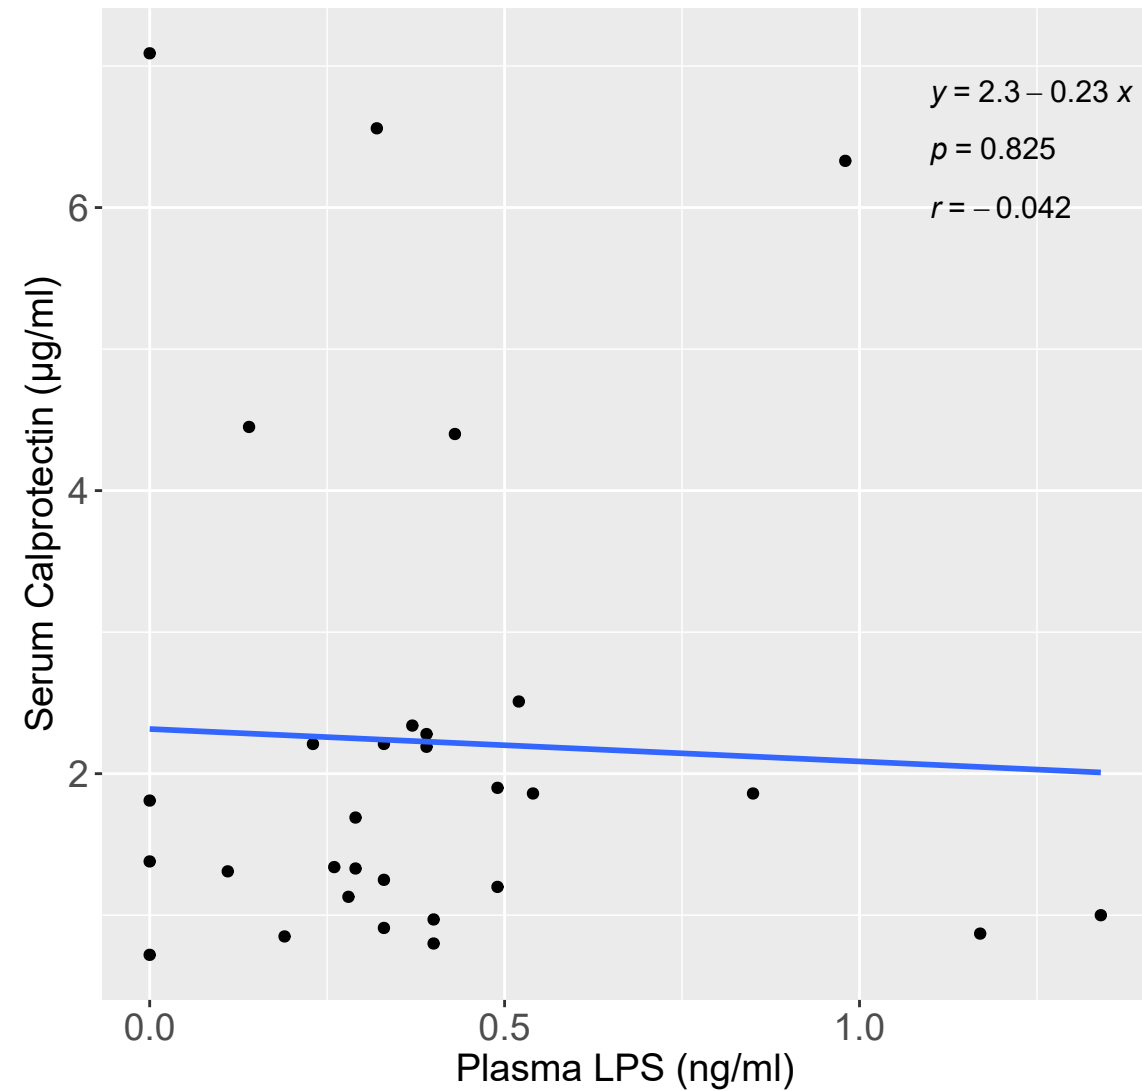

Supplement: s1 [file s1]

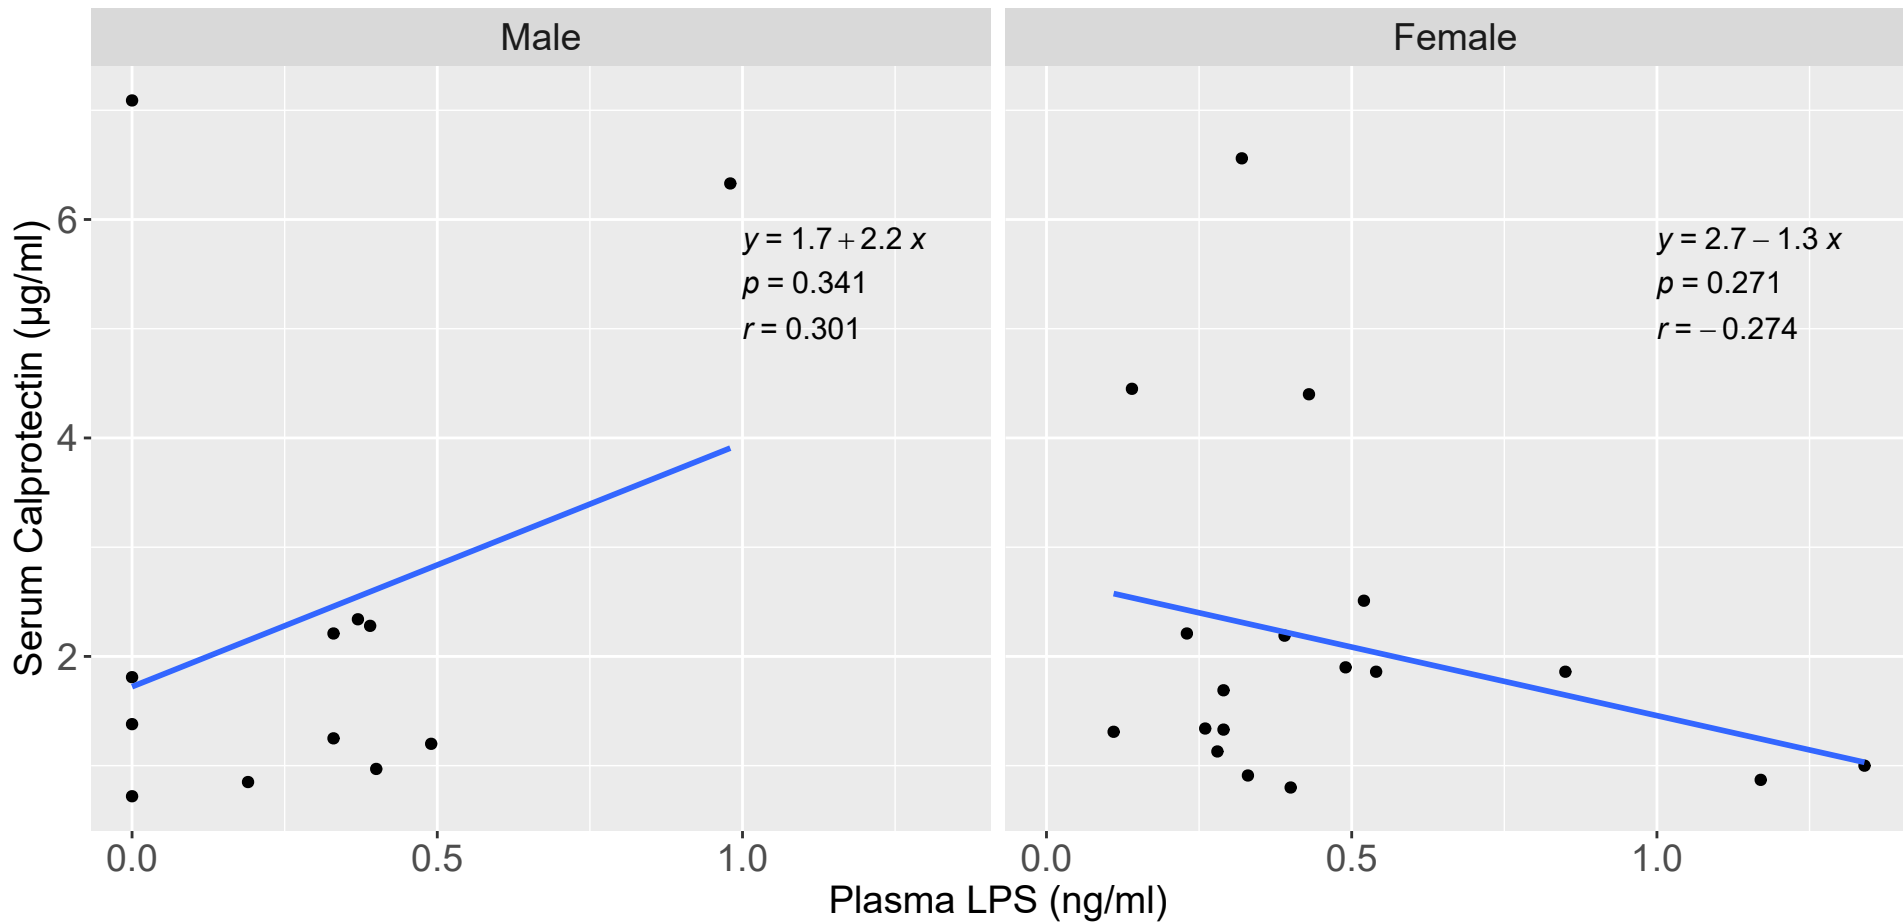

Supplement: s1 [file s1]

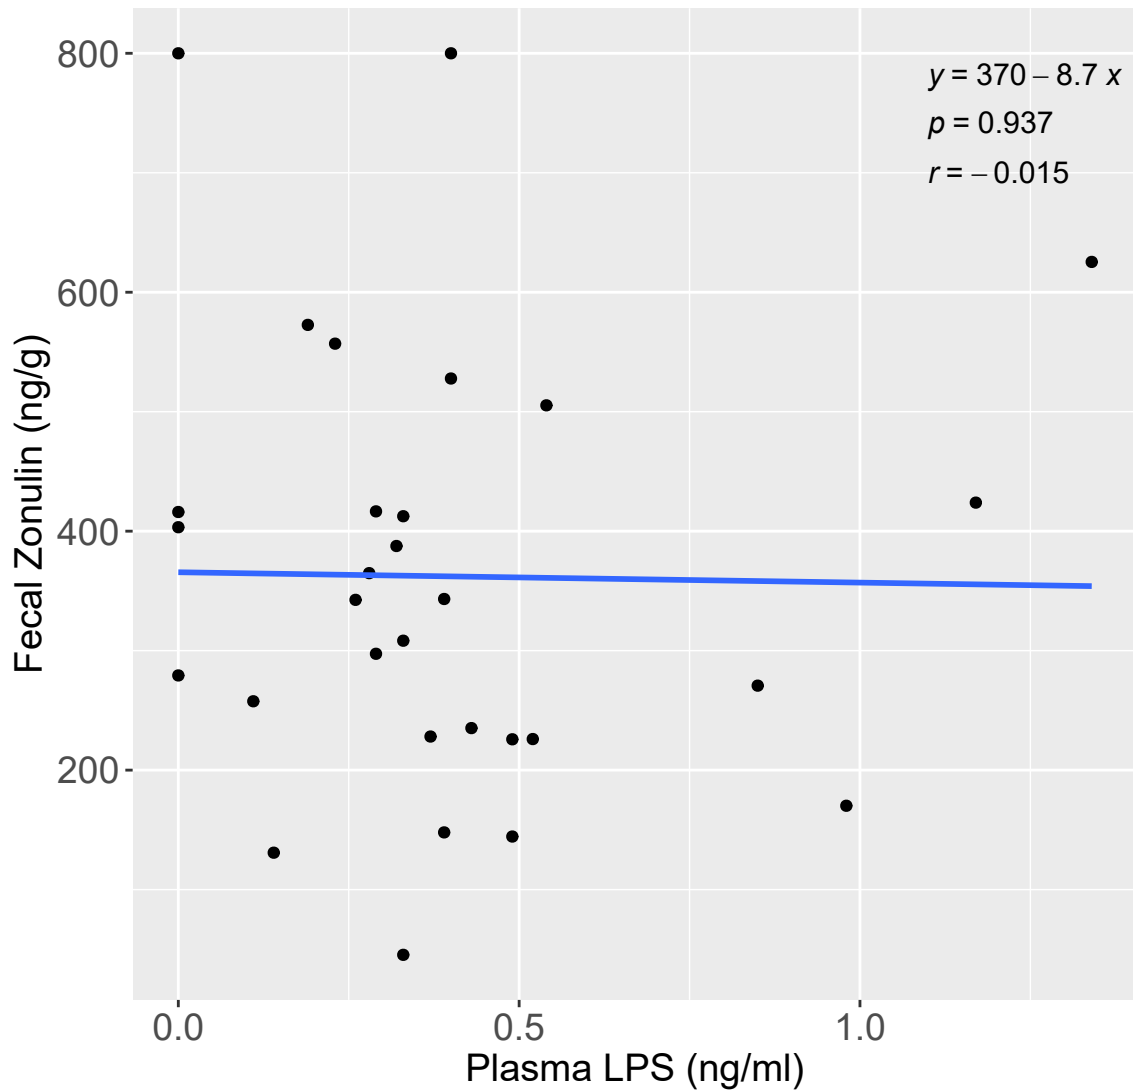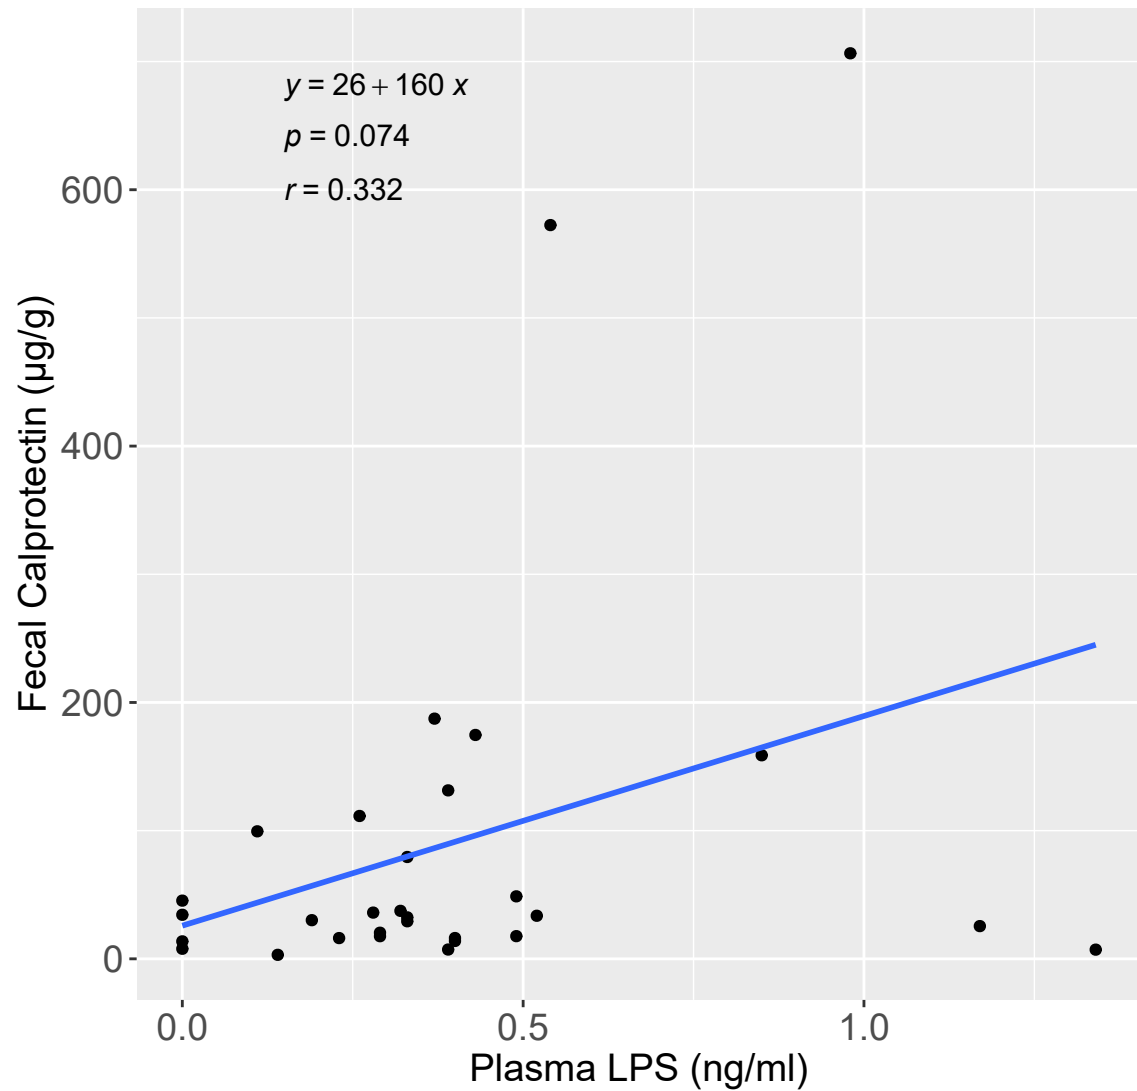

Supplement: s1 [file s1]

Serum Zonulin (ng/ml)

Male

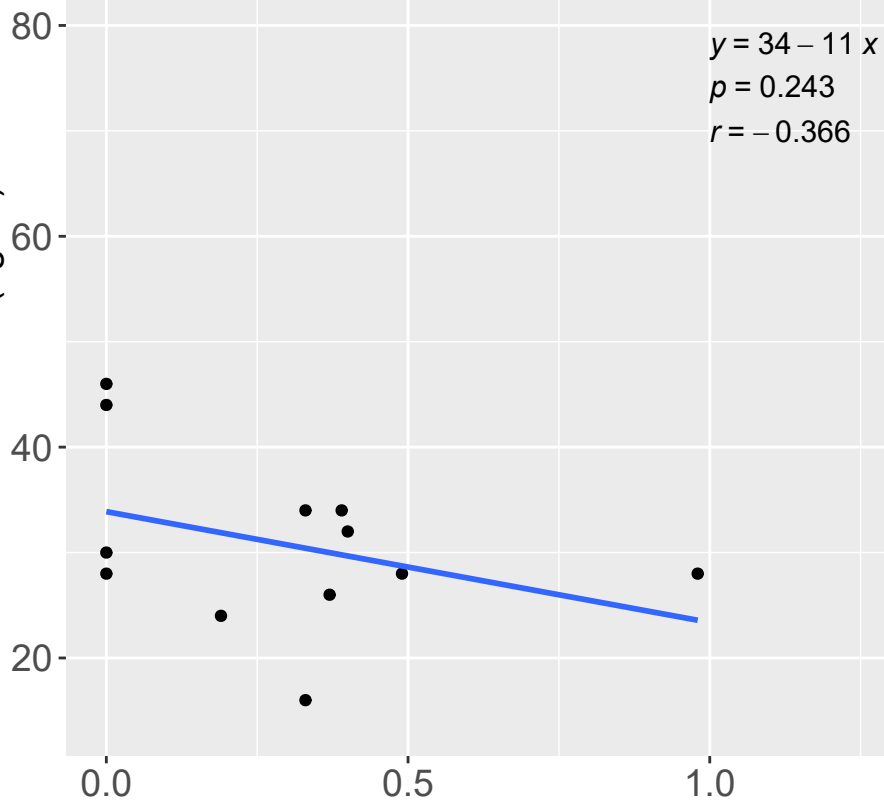

Female

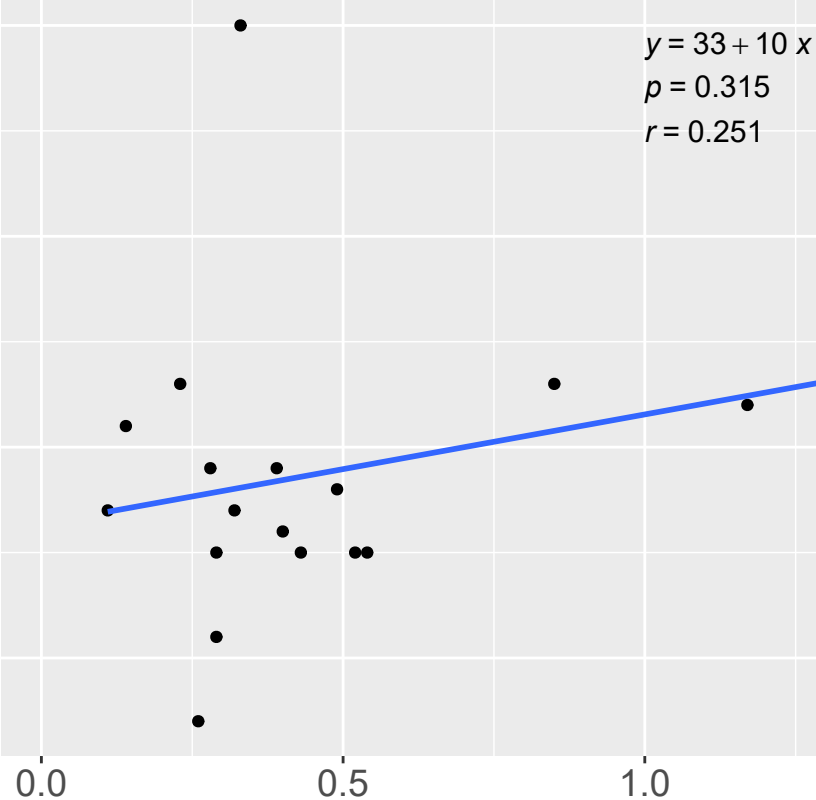

Plasma LPS (ng/ml)

Supplement: s1 [file s1]
